# Supplementary material for: The ING1a Tumor Suppressor Regulates Endocytosis to Induce Cellular Senescence Via the Rb-E2F Pathway
Source: PubMed Central journal article supplement (PMC3589274; doi:10.1371/journal.pbio.1001502), 2013-03-05
Supplement: pbio.1001502.s007.pdf [file pbio.1001502.s007.pdf]

**Supplementary table S2: Genes downregulated 1.5 in response to ING1a over-expression**

| Gene ID   | Fold Change | Gene Description                                                                      |
|-----------|-------------|---------------------------------------------------------------------------------------|
| M76559    | -13.03      | calcium channel, voltage-dependent, alpha 2/delta subunit 1                           |
| S72487    | -10.63      | endothelial cell growth factor 1 (platelet-derived)                                   |
| AF007548  | -4.43       | golgi SNAP receptor complex member 2                                                  |
| U49070    | -3.17       | protein (peptidyl-prolyl cis/trans isomerase) NIMA-interacting 1                      |
| M31994    | -2.8        | aldehyde dehydrogenase 1, soluble                                                     |
| AJ271671  | -2.42       | zinc/iron regulated transporter-like                                                  |
| AL080090  | -2.38       | anaphase-promoting complex 10                                                         |
| D45887    | -2.36       | calmodulin 2 (phosphorylase kinase, delta)                                            |
| AF070600  | -2.3        | Homo sapiens clone 24703 beta-tubulin mRNA, complete cds                              |
| X52259    | -2.29       | Human sec oncogene for SEC protein                                                    |
| M57567    | -2.28       | ADP-ribosylation factor 5                                                             |
| M58028    | -2.1        | ubiquitin-activating enzyme E1 (A1S9T and BN75 temperature sensitivity complementing) |
| AL031118  | -2.09       | Human DNA sequence from clone 153G14 on chromosome 6p21.3-22.2.                       |
| NM_001449 | -2.07       | four and a half LIM domains 1                                                         |
| AF065241  | -2.06       | Homo sapiens thioredoxin delta 3 (TXN delta 3) mRNA, partial cds                      |
| X04802    | -2.04       | Homo sapiens UBBP2 pseudogene for ubiquitin UBB                                       |
| AL031903  | -2.04       | Human DNA sequence from clone 1032F13 on chromosome Xq25-26.3.                        |
| X57351    | -2.04       | interferon induced transmembrane protein 2 (1-8D)                                     |
| AF049498  | -1.99       | sodium channel, voltage-gated, type II, beta polypeptide                              |
| L12168    | -1.98       | adenylyl cyclase-associated protein                                                   |
| X01703    | -1.98       | Tubulin, alpha, brain-specific                                                        |
| NM_015928 | -1.95       | androgen-induced prostate proliferative shutoff associated protein                    |
| U39840    | -1.95       | hepatocyte nuclear factor 3, alpha                                                    |
| L22005    | -1.94       | cell division cycle 34                                                                |
| AB019565  | -1.94       | interferon, alpha-inducible protein (clone IFI-6-16)                                  |
| U89505    | -1.94       | RNA binding motif protein 4                                                           |
| AJ276003  | -1.92       | GAR1 protein                                                                          |
| D38583    | -1.92       | S100 calcium-binding protein A11 (calgizzarin)                                        |
| U30827    | -1.92       | splicing factor, arginine/serine-rich 5                                               |
| NM_002848 | -1.91       | protein tyrosine phosphatase, receptor type, O                                        |
| AF006082  | -1.9        | ARP2 (actin-related protein 2, yeast) homolog                                         |
| X87160    | -1.89       | sodium channel, nonvoltage-gated 1, gamma                                             |
| L08048    | -1.88       | high-mobility group (nonhistone chromosomal) protein 1-like 10                        |
| AC004534  | -1.88       | mouse thiamin pyrophosphokinase homolog                                               |
| L09159    | -1.87       | ras homolog gene family, member A                                                     |
| M26880    | -1.87       | ubiquitin C                                                                           |
| X16609    | -1.85       | ankyrin 1, erythrocytic                                                               |
| U56637    | -1.84       | capping protein (actin filament) muscle Z-line, alpha 1                               |

|           |       |                                                                                                                                                                          |
|-----------|-------|--------------------------------------------------------------------------------------------------------------------------------------------------------------------------|
| AL049932  | -1.84 | programmed cell death 4                                                                                                                                                  |
| AJ000519  | -1.84 | ubiquitin-conjugating enzyme E2L 3                                                                                                                                       |
| AF131774  | -1.83 | Homo sapiens clone 25020 mRNA sequence                                                                                                                                   |
| AF045581  | -1.82 | BRCA1 associated protein-1 (ubiquitin carboxy-terminal hydrolase)<br>fibroblast growth factor 3 (murine mammary tumor virus integration site (v-int-2) oncogene homolog) |
| X14445    | -1.81 |                                                                                                                                                                          |
| M31899    | -1.8  | excision repair cross-complementing rodent repair deficiency, complementation group 3                                                                                    |
| AL021938  | -1.8  | jumonji (mouse) homolog                                                                                                                                                  |
| Y00503    | -1.8  | keratin 19                                                                                                                                                               |
| AB041269  | -1.78 | Homo sapiens mRNA for keratin 19, partial cds, isolate:K19-141                                                                                                           |
| U53445    | -1.77 | downregulated in ovarian cancer 1                                                                                                                                        |
| X02152    | -1.77 | lactate dehydrogenase A                                                                                                                                                  |
| AB020693  | -1.76 | neuroendocrine-specific protein C like (foocen)                                                                                                                          |
| S50869    | -1.76 | Platelet-derived growth factor A-chain [human, Genomic, 3559 nt 2 segments]                                                                                              |
| AL050179  | -1.76 | tropomyosin 1 (alpha)                                                                                                                                                    |
| M11353    | -1.75 | H3 histone, family 3A                                                                                                                                                    |
| AL050318  | -1.75 | myosin regulatory light chain 2, smooth muscle isoform                                                                                                                   |
| AF251040  | -1.75 | putative nuclear protein                                                                                                                                                 |
| AF015950  | -1.75 | telomerase reverse transcriptase                                                                                                                                         |
| X77584    | -1.75 | thioredoxin                                                                                                                                                              |
| AL117428  | -1.74 | DKFZP434A236 protein                                                                                                                                                     |
| U32645    | -1.74 | E74-like factor 4 (ets domain transcription factor)                                                                                                                      |
| L35240    | -1.73 | enigma (LIM domain protein)                                                                                                                                              |
| AF089841  | -1.73 | filamin C, gamma (actin-binding protein-280)                                                                                                                             |
| M16660    | -1.73 | heat shock 90kD protein 1, beta                                                                                                                                          |
| Y09723    | -1.73 | zinc finger protein 151 (pHZ-67)                                                                                                                                         |
| AF042162  | -1.72 | cytochrome c oxidase subunit Va pseudogene 1                                                                                                                             |
| X52104    | -1.72 | DEAD/H (Asp-Glu-Ala-Asp/His) box polypeptide 5 (RNA helicase, 68kD)                                                                                                      |
| M57892    | -1.71 | carbonic anhydrase VI                                                                                                                                                    |
| AB002345  | -1.71 | period (Drosophila) homolog 2                                                                                                                                            |
| U22376    | -1.71 | v-myb avian myeloblastosis viral oncogene homolog                                                                                                                        |
| L06132    | -1.71 | voltage-dependent anion channel 1                                                                                                                                        |
| L06133    | -1.7  | ATPase, Cu <sup>++</sup> transporting, alpha polypeptide (Menkes syndrome)                                                                                               |
| Z73497    | -1.7  | Human DNA sequence from clone U240C2 on chromosome X                                                                                                                     |
| AF061736  | -1.7  | ubiquitin-conjugating enzyme E2L 6                                                                                                                                       |
| Z37994    | -1.69 | H.sapiens alpha E-catenin pseudogene                                                                                                                                     |
| X94754    | -1.69 | methionine-tRNA synthetase                                                                                                                                               |
| M60614    | -1.69 | Wilms tumor associated protein                                                                                                                                           |
| X99268    | -1.68 | twist (Drosophila) homolog                                                                                                                                               |
| NM_001651 | -1.67 | aquaporin 5                                                                                                                                                              |
| AK000379  | -1.67 | asparagine synthetase                                                                                                                                                    |
| AF049703  | -1.67 | E74-like factor 5 (ets domain transcription factor)                                                                                                                      |
| AL035604  | -1.67 | Human DNA sequence from clone 38C16 on chromosome 6q22.33-24.1. Contains GAPD                                                                                            |

|           |       |                                                                                         |
|-----------|-------|-----------------------------------------------------------------------------------------|
| U39318    | -1.67 | ubiquitin-conjugating enzyme E2D 3 (homologous to yeast UBC4/5)                         |
| NM_007038 | -1.66 | a disintegrin-like and metalloprotease with thrombospondin type 1 motif, 5              |
| J04823    | -1.66 | cytochrome c oxidase subunit VIII                                                       |
| AF038847  | -1.66 | FK506-binding protein 6 (36kD)                                                          |
| K03191    | -1.64 | cytochrome P450, subfamily I (aromatic compound-inducible), polypeptide 1               |
| U90920    | -1.64 | PTPL1-associated RhoGAP 1                                                               |
| X83618    | -1.63 | 3-hydroxy-3-methylglutaryl-Coenzyme A synthase 2 (mitochondrial)                        |
| AB017908  | -1.63 | 4F2 light chain                                                                         |
| AF072810  | -1.63 | bromodomain adjacent to zinc finger domain, 1B                                          |
| Z23090    | -1.63 | heat shock 27kD protein 1                                                               |
| AB022178  | -1.62 | calcitonin receptor                                                                     |
| AF099664  | -1.62 | Cdc42 effector protein 4                                                                |
| X86809    | -1.62 | phosphoprotein enriched in astrocytes 15                                                |
| AF086628  | -1.62 | VAMP (vesicle-associated membrane protein)-associated protein B and C                   |
| D00017    | -1.61 | annexin A2                                                                              |
| U65410    | -1.61 | MAD2 (mitotic arrest deficient, yeast, homolog)-like 1                                  |
| X85237    | -1.61 | splicing factor 3a, subunit 1, 120kD                                                    |
| Z82248    | -1.61 | tyrosine 3-monooxygenase/tryptophan 5-monooxygenase activation protein, eta polypeptide |
| X15525    | -1.6  | acid phosphatase 2, lysosomal                                                           |
| M83667    | -1.6  | CCAAT/enhancer binding protein (C/EBP), delta                                           |
| X78924    | -1.6  | zinc finger protein 266                                                                 |
| M62895    | -1.59 | annexin A2 pseudogene 2                                                                 |
| AC002544  | -1.59 | eukaryotic translation initiation factor 3, subunit 8 (110kD)                           |
| AC004780  | -1.59 | hypothetical protein F17127_1                                                           |
| S81916    | -1.59 | Phosphoglycerate kinase {alternatively spliced}                                         |
| AF002697  | -1.58 | BCL2/adenovirus E1B 19kD-interacting protein 3                                          |
| AB005297  | -1.58 | brain-specific angiogenesis inhibitor 1                                                 |
| AB007977  | -1.58 | Homo sapiens mRNA, chromosome 1 specific transcript KIAA0508                            |
| L36149    | -1.57 | chemokine (C motif) XC receptor 1                                                       |
| M14200    | -1.57 | diazepam binding inhibitor (GABA receptor modulator, acyl-Coenzyme A binding protein)   |
| D38550    | -1.57 | E2F transcription factor 3                                                              |
| U32944    | -1.56 | dynein, cytoplasmic, light polypeptide                                                  |
| S82592    | -1.56 | ecotropic viral integration site 1                                                      |
| U10860    | -1.56 | guanine-monophosphate synthetase                                                        |
| X04801    | -1.56 | Homo sapiens UBBP1 pseudogene for ubiquitin UBB                                         |
| AL035461  | -1.56 | Human DNA sequence from clone 967N21 on chromosome 20p12.3-13.                          |
| AF071476  | -1.56 | regulator of G-protein signalling 9                                                     |
| K03195    | -1.56 | solute carrier family 2 (facilitated glucose transporter), member 1                     |
| AB004885  | -1.56 | tousled-like kinase 1                                                                   |
| K00558    | -1.56 | tubulin, alpha, ubiquitous                                                              |
| NM_002390 | -1.55 | a disintegrin and metalloproteinase domain 11                                           |
| D78014    | -1.55 | dihydropyrimidinase-like 3                                                              |
| AC004774  | -1.55 | distal-less homeo box 6                                                                 |

|           |       |                                                                                      |
|-----------|-------|--------------------------------------------------------------------------------------|
| M22919    | -1.55 | myosin, light polypeptide 6, alkali, smooth muscle and non-muscle                    |
| M15990    | -1.55 | v-yes-1 Yamaguchi sarcoma viral oncogene homolog 1                                   |
| Z46389    | -1.55 | vasodilator-stimulated phosphoprotein                                                |
| AF100781  | -1.55 | WNT1 inducible signaling pathway protein 3                                           |
| M11567    | -1.54 | angiogenin, ribonuclease, RNase A family, 5                                          |
| M90356    | -1.54 | basic transcription factor 3-like 3                                                  |
| X78520    | -1.54 | chloride channel 3                                                                   |
| U62437    | -1.54 | cholinergic receptor, nicotinic, beta polypeptide 2 (neuronal)                       |
| X92120    | -1.54 | DNA-damage-inducible transcript 3                                                    |
| AC004957  | -1.54 | Homo sapiens PAC clone DJ1093O17 from 7q11.23-q21                                    |
| U43142    | -1.54 | vascular endothelial growth factor C                                                 |
| AL162086  | -1.54 | villin 2 (ezrin)                                                                     |
| X79448    | -1.53 | adenosine deaminase, RNA-specific                                                    |
| AF062529  | -1.53 | nudix (nucleoside diphosphate linked moiety X)-type motif 3                          |
| S66431    | -1.53 | retinoblastoma-binding protein 2                                                     |
| X91247    | -1.53 | thioredoxin reductase 1                                                              |
| U51224    | -1.53 | U2 small nuclear ribonucleoprotein auxiliary factor, small subunit 1                 |
| S58544    | -1.52 | 75 kda infertility-related sperm protein [human, testis, mRNA Partial, 2427 nt]      |
| NM_005929 | -1.52 | antigen p97 (melanoma associated) identified by monoclonal antibodies 133.2 and 96.5 |
| Y15286    | -1.52 | ATPase, H <sup>+</sup> transporting, lysosomal (vacuolar proton pump) 9kD            |
| NM_001403 | -1.52 | eukaryotic translation elongation factor 1 alpha 1-like 14                           |
| AB011143  | -1.52 | Grb2-associated binder 2                                                             |
| M12529    | -1.51 | apolipoprotein E                                                                     |
| AJ005670  | -1.51 | dachshund (Drosophila) homolog                                                       |
| AF011466  | -1.51 | endothelial differentiation, lysophosphatidic acid G-protein-coupled receptor, 4     |
| AC004908  | -1.51 | Homo sapiens PAC clone DJ0855D21                                                     |
| U31120    | -1.51 | interleukin 13                                                                       |
| AF005392  | -1.51 | tubulin, alpha 2                                                                     |
| X05908    | -1.5  | annexin A1                                                                           |
| Z31357    | -1.5  | cysteine dioxygenase, type I                                                         |
| AL031313  | -1.5  | Human DNA sequence from clone 581F12 on chromosome Xq21.                             |
| NM_006447 | -1.5  | ubiquitin specific protease 16                                                       |
